# Supplementary material for: Comparative Efficacy of Different Drugs for the Treatment of Dilated Cardiomyopathy: A Systematic Review and Network Meta-analysis
Source: Springer Nature journal article supplement (doi:10.1007/s40268-023-00435-5), 2023-08-09
Supplement: MOESM3 [file 25904198]

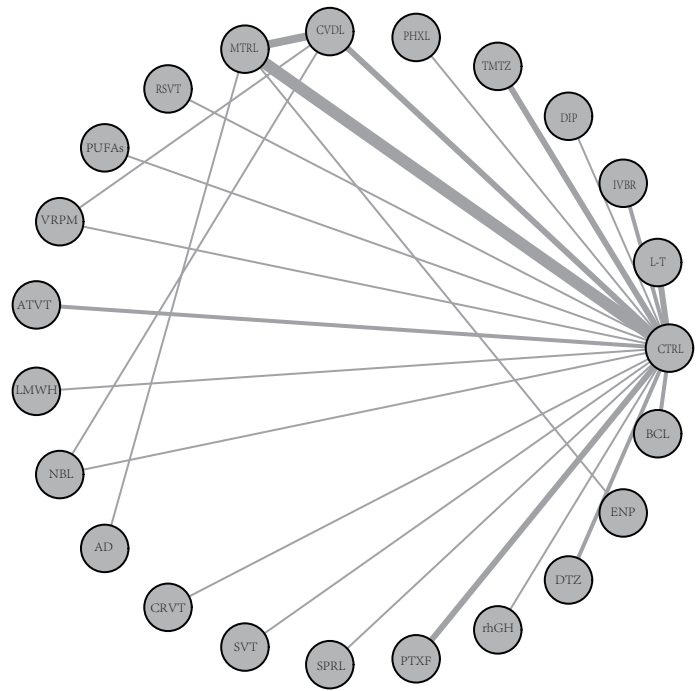

left ventricular ejection fraction (LVEF)

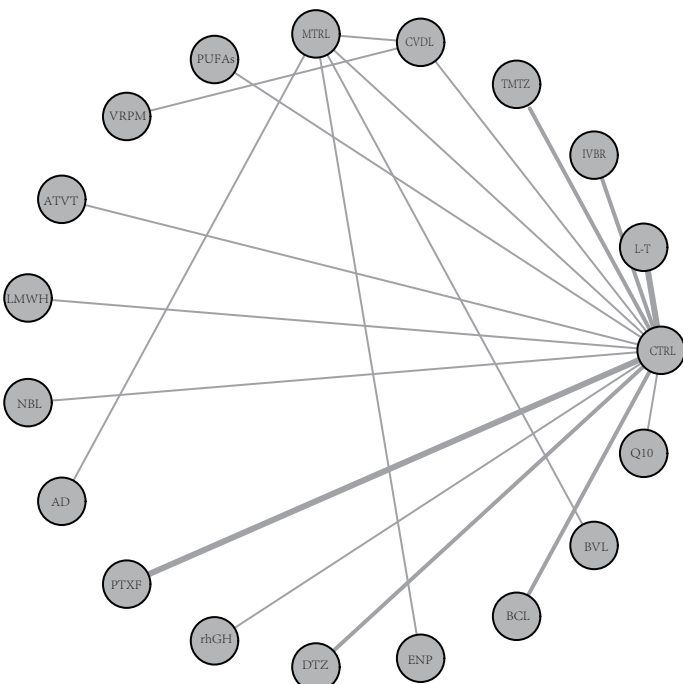

left ventricular end-diastolic dimension (LVEDD)

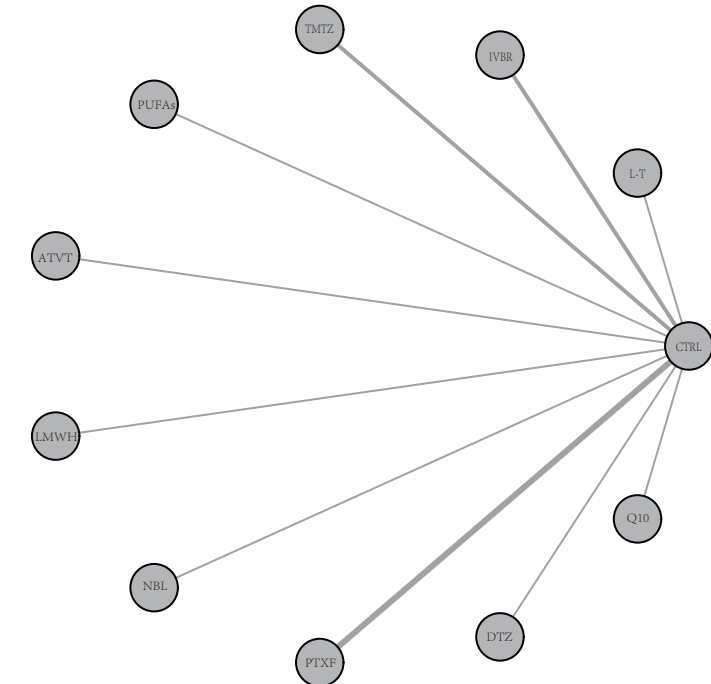

left ventricular end-systolic dimension(LVESD)

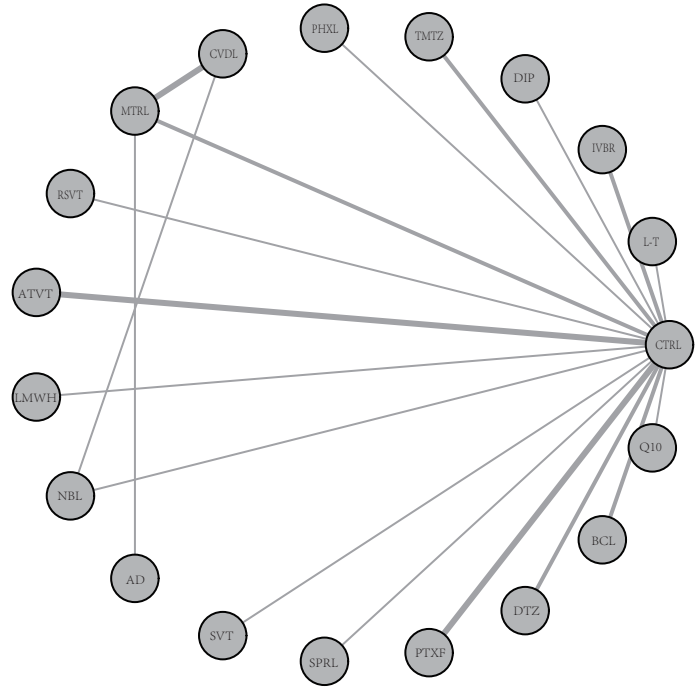

New York Heart Association classification(NYHA)

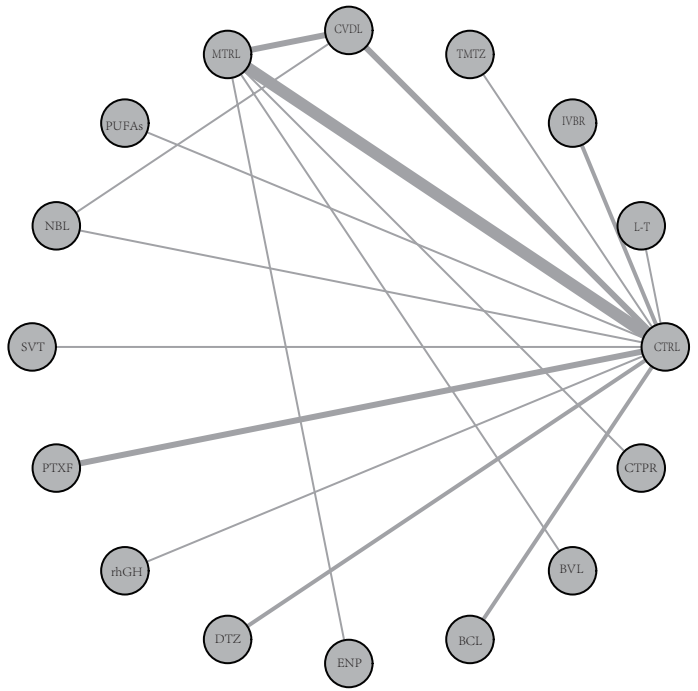

heart rate(HR)
