# Supplementary figures and images for: Comparative Efficacy of Different Drugs for the Treatment of Dilated Cardiomyopathy: A Systematic Review and Network Meta-analysis
Source: Springer Nature journal article supplement (doi:10.1007/s40268-023-00435-5), 2023-08-09

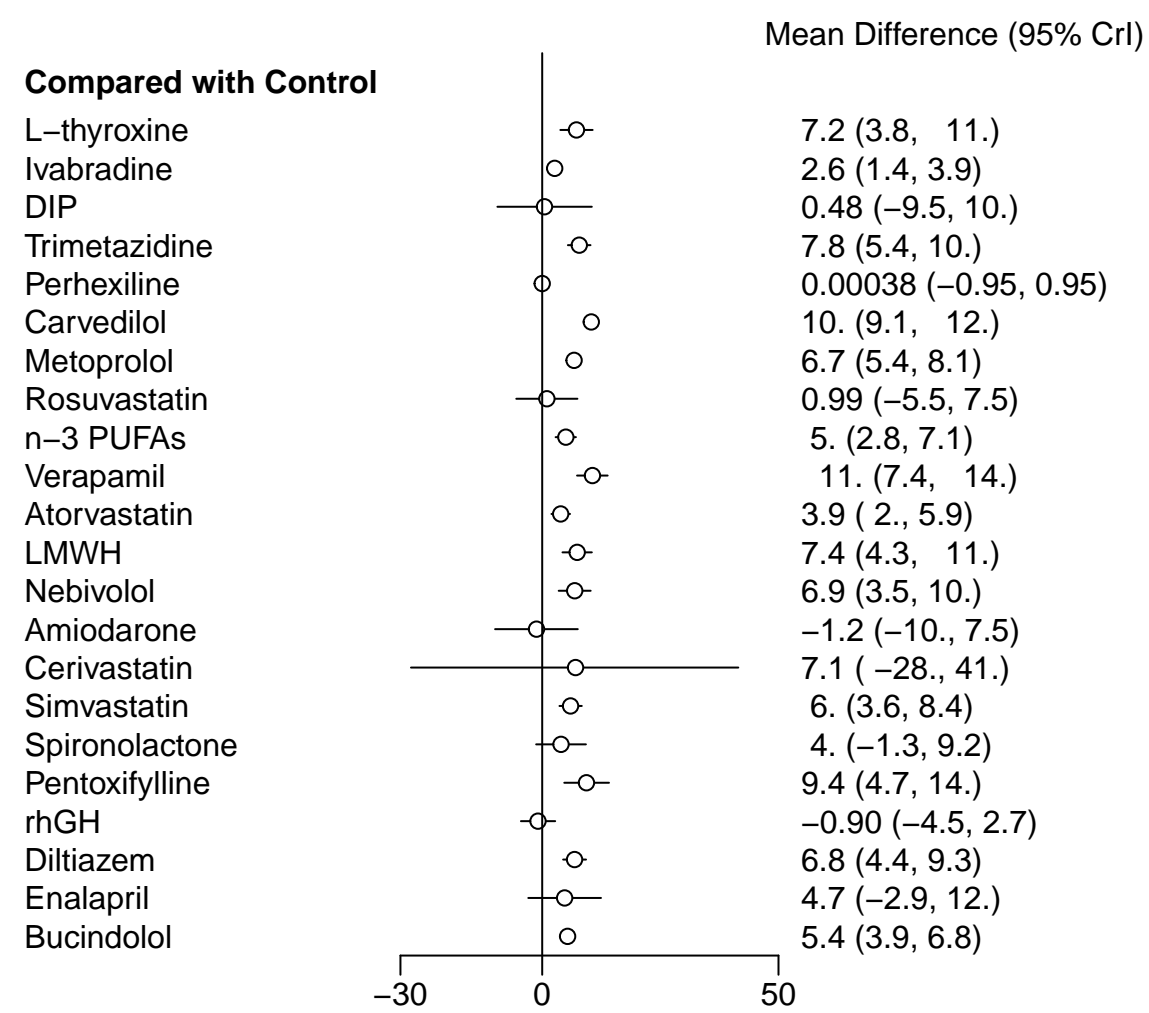

Supplement: MOESM4 [file 25904198]

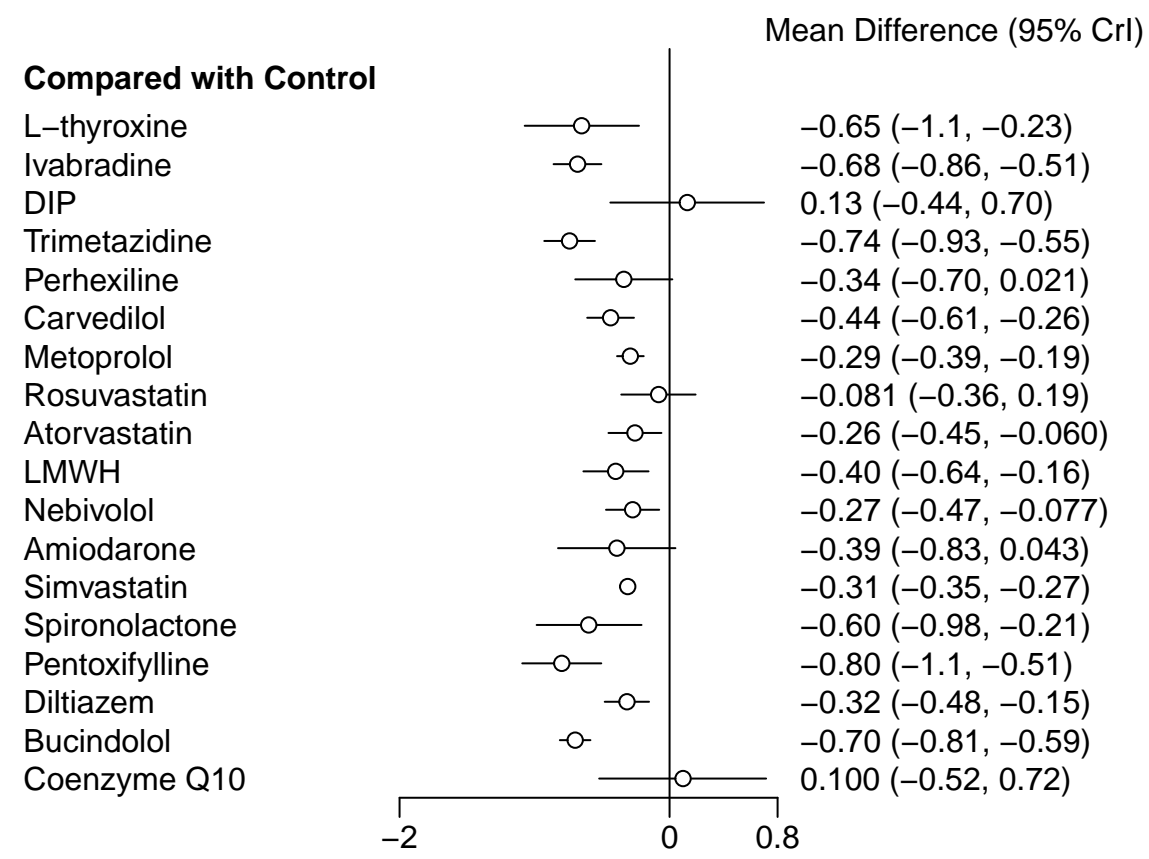

Supplement: MOESM5 [file 25904198]

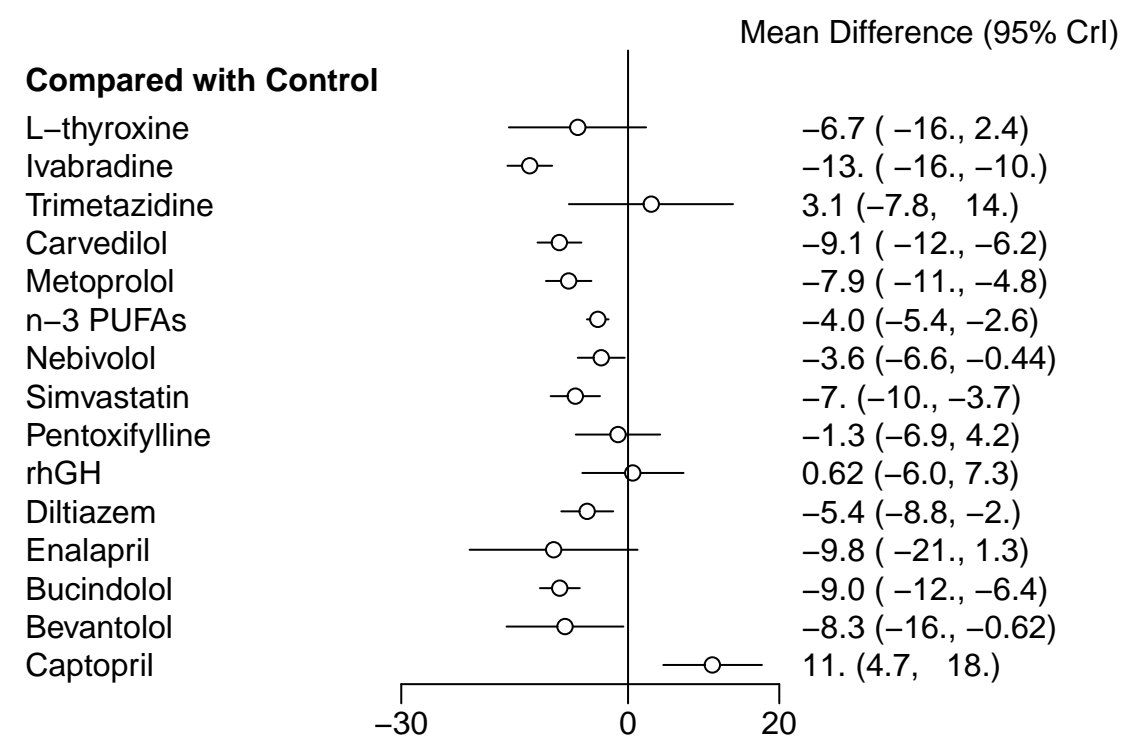

Supplement: MOESM6 [file 25904198]
